# Supplementary material
Source: publisher figshare collection journal article supplement (https://acs.figshare.com/ndownloader/files/12982694)
Supplement: Supplementary file 1 [file 12982694]

## Supporting information

### Elucidating the Variability in the Hexabromocyclododecane Diastereomer Profile in the Global Environment

Li Li\*, Frank Wania

Department of Physical and Environmental Sciences, University of Toronto Scarborough, 1265 Military Trail, Toronto, Ontario, Canada M1C 1A4

\* Corresponding Author: Li L.; E-mail: [environ.li@mail.utoronto.ca](mailto:environ.li@mail.utoronto.ca). Phone: +1 (647)-601-4450.

This document includes 20 pages, 8 tables, and 2 figures.

## Table of Contents

|                                                                                                                                                   |    |
|---------------------------------------------------------------------------------------------------------------------------------------------------|----|
| <b>Table S1</b> Literature-reported measured concentrations of HBCDD diastereomers in air and soil samples across the world .....                 | 2  |
| <b>Table S2</b> Properties of HBCDD diastereomers .....                                                                                           | 4  |
| <b>Table S3</b> Global historical production of the technical HBCDD mixture as of 2015. ....                                                      | 5  |
| <b>Table S4</b> Distribution of consumption of the technical HBCDD mixture among five applications .....                                          | 6  |
| <b>Table S5</b> Net import and export fractions of the technical HBCDD mixture between regions. ....                                              | 7  |
| <b>Table S6</b> Emission and waste factors in CiP-CAFE modeling .....                                                                             | 9  |
| <b>Table S7</b> Fractions of polystyrene insulation boards (in AP1 and AP2) and packaging materials (in AP4) subject to recycling and reuse ..... | 11 |
| <b>Table S8</b> Isomerization factor matrixes.....                                                                                                | 12 |
| <b>Figure S1</b> Lifespan distribution of buildings in seven modeled regions.....                                                                 | 14 |
| <b>Figure S2</b> Response of modeled atmospheric concentrations in grid cells #79 (a), #81 (b) and #13 (c) to emissions.....                      | 15 |

**Table S1** Literature-reported measured concentrations of HBCDD diastereomers in air and soil samples across the world  
Measurements are obtained from monitoring reports and peer-reviewed journal articles. Included are measurements with the sampling environment explicitly described in the original texts and a sampling size greater than 1.

| Sampling site                   | Medium             | Description              | Sampling time | Sampling size | Diastereomer composition |                |                 | $\alpha/\gamma$ ratio | Ref. |
|---------------------------------|--------------------|--------------------------|---------------|---------------|--------------------------|----------------|-----------------|-----------------------|------|
|                                 |                    |                          |               |               | $\alpha$ -HBCDD          | $\beta$ -HBCDD | $\gamma$ -HBCDD |                       |      |
| Production and industrial sites |                    |                          |               |               |                          |                |                 |                       |      |
| Shanghai, CN                    | Air                | Industrial sites         | 2006          | 7             | 29.7%                    | 13.1%          | 51.0%           | 0.6                   | 1    |
| Guangdong, CN                   | Soil               | Industrial sites         | 2006-2008     | 32            | 6%-37%                   | 3%-10%         | 54%-91%         | 0.06-0.7              | 2    |
| Laizhou Bay, CN                 | Soil               | Production sites         | 2010          | 15            | 20.4%                    | 12.3%          | 67.3%           | 0.3                   | 3    |
| Tianjin, CN                     | Soil               | Industrial sites         | 2015          | 13            | 41%                      | 11%            | 48%             | 0.8                   | 4    |
| Weifang, CN                     | Soil               | Production sites         | 2015          | 19            | 17%                      | 11%            | 72%             | 0.2                   | 4    |
| Remote background areas         |                    |                          |               |               |                          |                |                 |                       |      |
| Ny-Ålesund, NO                  | Air                | Remote sites             | 2007          | 15            | 25%                      | n.d.           | 75%             | 0.3                   | 5    |
| Birkenes, NO                    | Air                | Remote sites             | 2007          | 14            | 47%                      | 6%             | 47%             | 1.0                   | 5    |
| Greenland, DK                   | Air <sup>(1)</sup> | Remote sites             | 2012          | 13            | 16%-69%                  | 7%-20%         | 16%-78%         | 0.2-4.4               | 6    |
| Sleeping Bear Dunes, MI         | Air                | Remote sites             | 2014          | 27            | 39%                      | 9%             | 52%             | 0.8                   | 7    |
| Sturgeon Point, MI              | Air                | Remote sites             | 2014          | 25            | 50%                      | 9%             | 41%             | 1.2                   | 7    |
| Populated urban and rural areas |                    |                          |               |               |                          |                |                 |                       |      |
| Bloomington, IN                 | Air                | Small university town    | 2003          | 3             | 32%-78%                  | 6.1%-12%       | 9.7%-61%        | 0.52-8.0              | 8    |
| Guangzhou, CN                   | Air                | Urban and suburban areas | 2004          | 32            | 59%-68%                  | 11%-13%        | 21%-27%         | 2.2-3.6               | 9    |
| Shanghai, CN                    | Air                | Urban area               | 2006          | 18            | 48%-52%                  | 13%-17%        | 28%-30%         | 1.6-1.8               | 1    |
| Birmingham, UK                  | Air                | Urban-suburban transect  | 2012-2013     | 8             | 34%-51%                  | 18%-28%        | 24%-43%         | 0.8-2.3               | 10   |
| Stockholm, SE                   | Soil               | Urban area               | 2012          | 4             | 49%-72%                  | 8%-13%         | 16%-42%         | 1.2-4.6               | 11   |
| Stockholm, SE                   | Soil               | Rural area               | 2012          | 4             | 5%-65%                   | 6%-11%         | 32%-84%         | 0.05-1.9              | 11   |
| Chicago, MI                     | Air                | Urban area               | 2014          | 18            | 40%                      | 11%            | 49%             | 0.81                  | 7    |

|                             |      |                                           |           |    |         |       |         |         |   |
|-----------------------------|------|-------------------------------------------|-----------|----|---------|-------|---------|---------|---|
| Cleveland, OH               | Air  | Urban area                                | 2014      | 22 | 27%     | 18%   | 54%     | 0.5     | 7 |
| Cangzhou, CN                | Soil | Area with professional use <sup>(2)</sup> | 2015      | 12 | 74%     | 15%   | 11%     | 7.0     | 4 |
| <b>Waste disposal sites</b> |      |                                           |           |    |         |       |         |         |   |
| Qingyuan, CN                | Soil | E-waste recycling sites                   | 2006-2008 | 31 | 36%-36% | 5%-9% | 55%-59% | 0.6-0.7 | 2 |
| Guiyu, CN                   | Soil | E-waste recycling sites                   | 2006-2008 | 27 | 56%     | 10%   | 33%     | 1.7     | 2 |

Notes:

CN = China; NO = Norway; DK = Denmark; MI = Michigan, United States; IN = Indiana, United States; UK = United Kingdom; SE = Sweden;

OH = Ohio, United States

(1) Concentrations in particulate phase.

(2) Formulation and cutting of flame-retarded polystyrene plastics before use.

**Table S2** Properties of HBCDD diastereomers

| Property                                                                       | Symbol          | $\alpha$ -HBCDD | $\beta$ -HBCDD | $\gamma$ -HBCDD | Reference |
|--------------------------------------------------------------------------------|-----------------|-----------------|----------------|-----------------|-----------|
| Molecular weight (g mol <sup>-1</sup> )                                        | $MW$            | 647.1           | 647.1          | 647.1           | 12        |
| Air-water partition coefficient at 25°C (-)                                    | $\log K_{AW}$   | -4.36           | -4.76          | -4.23           | 12        |
| Octanol-air partition coefficient at 25°C (-)                                  | $\log K_{OA}$   | 9.96            | 10.5           | 10.4            | 12        |
| Octanol-water partition coefficient at 25°C (-)                                | $\log K_{OW}$   | 5.38            | 5.47           | 5.80            | 12        |
| Internal energy of air-water phase transfer (kJ mol <sup>-1</sup> )            | $\Delta U_{AW}$ | 76.2            | 80.7           | 80.0            | (1)       |
| Internal energy of octanol-water phase transfer (kJ mol <sup>-1</sup> )        | $\Delta U_{OW}$ | -20.0           | -20.0          | -20.0           | (1)       |
| Internal energy of octanol-air phase transfer (kJ mol <sup>-1</sup> )          | $\Delta U_{OA}$ | -96.2           | -100.7         | -100.0          | (1)       |
| Degradation half-life in air (h)                                               | $HL_{air}$      | 31.2            | 31.2           | 31.2            | 12        |
| Degradation half-life in soil (h)                                              | $HL_{soil}$     | 2040            | 2040           | 2040            | 12        |
| Degradation half-life in sediment (h) <sup>(2)</sup>                           | $HL_{sed}$      | 840             | 840            | 840             | 12        |
| Degradation half-life in water and WWTP (h) <sup>(2)</sup>                     | $HL_{water}$    | 2040            | 2040           | 2040            | 12        |
| Degradation half-life in landfill and dump (h)                                 | $HL_{waste}$    | 13032           | 13032          | 13032           | 13        |
| Degradation half-life in vegetation (h)                                        | $HL_{veg}$      | 2040            | 2040           | 2040            | 12        |
| Activation energy for degradation in atmosphere (kJ mol <sup>-1</sup> )        | $E_{air}$       | 10              | 10             | 10              | (3)       |
| Activation energy for degradation in soil (kJ mol <sup>-1</sup> )              | $E_{soil}$      | 20              | 20             | 20              | (3)       |
| Activation energy for degradation in sediment (kJ mol <sup>-1</sup> )          | $E_{sed}$       | 20              | 20             | 20              | (3)       |
| Activation energy for degradation in water and WWTP (kJ mol <sup>-1</sup> )    | $E_{water}$     | 20              | 20             | 20              | (3)       |
| Activation energy for degradation in landfill and dump (kJ mol <sup>-1</sup> ) | $E_{waste}$     | 20              | 20             | 20              | -         |
| Activation energy for degradation in vegetation (kJ mol <sup>-1</sup> )        | $E_{veg}$       | 20              | 20             | 20              | (3)       |

Note: (1) Calculated according to MacLeod et al.<sup>14</sup> based on Trouton's Rule and defaults.

(2) The same degradation half-lives are applied to the three diastereomers because earlier work observed no statistically significant difference in the kinetics of degradation of diastereomers in wastewater sludge and sediment.<sup>15</sup>

(3) Default values in BETR-Global 2.0.

**Table S3** Global historical production of the technical HBCDD mixture as of 2015.

| Region | Production period                  | Cumulative production<br>(kilo tonnes) | Historical producing countries<br>(number of producers) | Sources        |
|--------|------------------------------------|----------------------------------------|---------------------------------------------------------|----------------|
| RE1    | 2000-present (2015)                | 158.5 (26.6%)                          | China (>14 <sup>(1)</sup> )                             | 16, 17         |
| RE2    | 1985-2013                          | 23.2 (3.9%)                            | Japan (>1)                                              | 18-22          |
| RE3    | 1990-2006 <sup>(2)</sup>           | 28.0 (4.7%)                            | Israel (1)                                              | 23, 24         |
|        |                                    |                                        | Turkey (unknown)                                        |                |
| RE4    | 2000-2004                          | 1.1 (0.2%)                             | Russia (1)                                              | 24, 25         |
|        |                                    |                                        | Ukraine (1)                                             |                |
|        |                                    |                                        | Czech (unknown)                                         |                |
| RE5    | 1965-present (2015) <sup>(3)</sup> | 149.5 (25.1%)                          | Netherlands (1)                                         | 20, 21, 26, 27 |
|        |                                    |                                        | United Kingdom (1, before 2003)                         |                |
|        |                                    |                                        | Germany (1, before 1997)                                |                |
| RE6    | 1965-present (2015) <sup>(4)</sup> | 235.5 (39.5%)                          | United States (4)                                       | 26, 28, 29     |
| RE7    | Not available                      |                                        |                                                         |                |

Notes:

(1) According to currently available information, there are at least 14 producers in China. However, the actual number is uncertain because of insufficient information. According to an announcement issued by China's Ministry of Environmental Protection on December 26, 2016, China is exempting production, use, import and export of HBCDD for manufacturing flame-retarded polystyrene insulation boards through December 25, 2021.\*

(2) Back-calculated from the balance of global production and consumption.

(3) According to EU Commission Regulation 2016/293, production of HBCDD for manufacturing flame-retarded polystyrene insulation boards is allowed until November 26, 2019.†

(4) In the 2016 public Chemical Data Reporting (CDR), Albemarle and Chemtura reported production of HBCDD in the United States, with the tonnages claimed as “confidential business information (CBI)”.<sup>29</sup> Production of HBCDD in the United States were reported to cease in 2016.<sup>29</sup>

\* A Chinese version of the announcement is available at: [http://www.mep.gov.cn/gkml/hbb/bgg/201612/t20161228\\_378327.htm](http://www.mep.gov.cn/gkml/hbb/bgg/201612/t20161228_378327.htm)

† Commission Regulation (EU) 2016/293 of 1 March 2016 amending Regulation (EC) No 850/2004 of the European Parliament and of the Council on persistent organic pollutants as regards Annex I. Available at:

[https://eur-lex.europa.eu/legal-content/EN/TXT/?uri=uriserv%3AOJ.L\\_.2016.055.01.0004.01.ENG](https://eur-lex.europa.eu/legal-content/EN/TXT/?uri=uriserv%3AOJ.L_.2016.055.01.0004.01.ENG)

**Table S4** Distribution of consumption of the technical HBCDD mixture among five applications

|     | AP1   | AP2   | AP3                 | AP4  | AP5  | Calculations                                                                                                                                                                                                                                                                                                                                                                            |
|-----|-------|-------|---------------------|------|------|-----------------------------------------------------------------------------------------------------------------------------------------------------------------------------------------------------------------------------------------------------------------------------------------------------------------------------------------------------------------------------------------|
| RE1 | 71.5% | 26.5% | 2.0% <sup>(1)</sup> | N.A. | N.A. | Taken from Li et al. <sup>16</sup>                                                                                                                                                                                                                                                                                                                                                      |
| RE2 | 8.5%  | 76.3% | 15.2%               | N.A. | N.A. | Calculated based on the lumped surveyed sales data between FR-polystyrene (84.8%) and FR-textiles (15.2%) for 2004-2011 in Japan. <sup>18</sup> Split between FR-EPS and FR-XPS based on the surveyed ratio of 1:9. <sup>18</sup>                                                                                                                                                       |
| RE3 | 50.0% | 50.0% | N.A.                | N.A. | N.A. | Assuming 50% of HBCDD each was used for FR-EPS and FR-XPS insulation boards due to a lack of information.                                                                                                                                                                                                                                                                               |
| RE4 | 83.8% | 16.2% | 2.0%                | 6.0% | 2.0% | Relative importance between AP1 and AP2 was calculated based on the relative market sizes of FR-EPS and FR-XPS between Western and Eastern Europe (30:17 and 10:1, respectively) and distribution ratio between AP1 and AP2 in RE5                                                                                                                                                      |
| RE5 | 43.0% | 47.0% | 2.0%                | 6.0% | 2.0% | Taken from ESWI report, <sup>30</sup> which combined surveyed EU data for the years 2000 <sup>21</sup> and 2006-2007 <sup>31</sup>                                                                                                                                                                                                                                                      |
| RE6 | 43.0% | 47.0% | <1%                 | 7.0% | 2.0% | Fraction used for textiles was collected from a USEPA report. <sup>32</sup> Because of a lack of available data, fraction for other applications were assumed to be same as those in RE5, <sup>32</sup> as indicated by Canada that “[t]he primary uses of HBCD in Canada (i.e., in EPS, XPS and textiles) are consistent with the ... global and European use patterns”. <sup>26</sup> |
| RE7 | 50.0% | 50.0% | N.A.                | N.A. | N.A. | Assuming 50% of HBCDD each was used for EPS and XPS insulation boards due to a lack of information.                                                                                                                                                                                                                                                                                     |

Note: (1) For the period 2000-2010.

**Table S5** Net import and export fractions of the technical HBCDD mixture between regions.

Import fraction: Fraction of import to a region in the annual total international trade (import fractions to all regions sum up to 100%);

Export fraction: Fraction of export from a region in its annual total production.

| Years      | Import fraction <sup>(1)</sup> |                    |                    |                    |     |     |                    | Export fraction    |     |     |     |                    |                    |     |
|------------|--------------------------------|--------------------|--------------------|--------------------|-----|-----|--------------------|--------------------|-----|-----|-----|--------------------|--------------------|-----|
|            | RE1                            | RE2 <sup>(2)</sup> | RE3 <sup>(3)</sup> | RE4 <sup>(4)</sup> | RE5 | RE6 | RE7 <sup>(3)</sup> | RE1 <sup>(5)</sup> | RE2 | RE3 | RE4 | RE5 <sup>(4)</sup> | RE6 <sup>(6)</sup> | RE7 |
| 1990-1994  |                                | 30%                |                    | 70%                |     |     |                    |                    |     |     |     | 30%                | 25%                |     |
| 1995-1999  |                                | 30%                |                    | 70%                |     |     |                    |                    |     |     |     | 20%                | 60%                |     |
| 2000-2004  |                                | 30%                |                    | 55%                |     |     | 15%                | 37%                |     |     |     | 20%                | 70%                |     |
| 2005-2009  |                                | 30%                | 5%                 | 50%                |     |     | 15%                | 37%                |     |     |     | 15%                | 70%                |     |
| 2010-2014  |                                | 25%                | 20%                | 40%                |     |     | 15%                | 37%                |     |     |     | 10%                | 70%                |     |
| After 2015 |                                | 25%                | 20%                | 40%                |     |     | 15%                |                    |     |     |     |                    | 70%                |     |

Notes:

- (1) Due to a lack of information, we assumed no international trade of the technical HBCDD mixture for the years before 1990.
- (2) Estimated based on the annual HBCDD consumptions of 600 – 2200 t for the period 1986 – 2001,<sup>20</sup> 555 – 1247 t for 2004-2011<sup>18</sup> in Japan, and the annual consumptions of 1500 t in 2011<sup>33</sup> and 1400~1600 in 2011-2014<sup>34</sup> in South Korea. Consumption data were rounded to nearest hundred and then extrapolated to fill gaps between reported years.
- (3) Calculated based on the global mass balance. Due to a lack of information, we further assumed that the annual consumption in the rest of Asia (RE3) and the rest of the world (RE7) is proportional to their population defined in CiP-CAFE. Consumption data were rounded to nearest hundred and then extrapolated to fill gaps between reported years.
- (4) Estimated based on the annual HBCDD consumptions in Europe, which were reported to be 8900 t in 1999,<sup>20</sup> 9500 t in 2001,<sup>26</sup> 9448 – 11186 t for 2003 – 2007,<sup>35</sup> 8913 and 9280 t in 2009 and 2010,<sup>36</sup> and 10000 – 125000 t in 2008 and 2011 – 2013.<sup>37</sup> We further assumed that the annual consumptions in Eastern (RE4) and Western Europe (RE5) are proportional to their population defined in CiP-CAFE. Consumption data were rounded to nearest hundred and then extrapolated to fill gaps between reported years.
- (5) Taken from Li et al.<sup>16</sup>

- (6) Estimated based on the historical records of annual HBCDD consumption of 3100 t for 1999,<sup>20</sup> 2800 t for 2001,<sup>26</sup> and 2200 – 2500 t for the period 2011-2015<sup>34</sup> in the United States, and the annual HBCDD consumption of 100 – 1000 t in Canada.<sup>38</sup> Consumption data were rounded to nearest hundred and then extrapolated to fill gaps between reported years.



**Table S6** Emission and waste factors in CiP-CAFE modeling

| Stage                       | Applications       | Lower atmosphere                          | Wastewater                |                      | Soil                                     |
|-----------------------------|--------------------|-------------------------------------------|---------------------------|----------------------|------------------------------------------|
|                             |                    |                                           | Freshwater <sup>(1)</sup> | WWTP                 |                                          |
| Production                  |                    | $4.0 \times 10^{-5}$ <sup>(2)</sup>       |                           | $1.2 \times 10^{-7}$ |                                          |
| Formulation                 | AP1                | $5.8 \times 10^{-6}$                      | $6.3 \times 10^{-5}$      | $1.4 \times 10^{-5}$ |                                          |
|                             | AP2                | $7.3 \times 10^{-6}$                      | $7.9 \times 10^{-6}$      | $6.6 \times 10^{-5}$ |                                          |
|                             | AP3                | ~0                                        | ~0                        | ~0                   |                                          |
|                             | AP4 <sup>(3)</sup> | $5.8 \times 10^{-6}$                      | $6.3 \times 10^{-5}$      | $1.4 \times 10^{-5}$ |                                          |
|                             | AP5 <sup>(4)</sup> | $5.8 \times 10^{-6}$                      | $6.3 \times 10^{-5}$      | $1.4 \times 10^{-5}$ |                                          |
| Processing                  | AP1                | $3.3 \times 10^{-5}$                      | $1.4 \times 10^{-6}$      | $5.6 \times 10^{-6}$ |                                          |
|                             | AP2                | $1.7 \times 10^{-5}$                      | $3.4 \times 10^{-6}$      | $1.4 \times 10^{-5}$ |                                          |
|                             | AP3                | $1.4 \times 10^{-5}$                      | $1.8 \times 10^{-3}$      | $7.2 \times 10^{-3}$ |                                          |
|                             | AP4 <sup>(3)</sup> | $3.3 \times 10^{-5}$                      | $1.4 \times 10^{-6}$      | $5.6 \times 10^{-6}$ |                                          |
|                             | AP5                | $3.0 \times 10^{-7}$                      | $6.2 \times 10^{-8}$      | $2.4 \times 10^{-7}$ |                                          |
| Use                         | AP1                | $5.2 \times 10^{-6}$                      |                           |                      |                                          |
|                             | AP2                | $6.9 \times 10^{-6}$                      |                           |                      |                                          |
|                             | AP3                | N.A.                                      |                           |                      |                                          |
|                             | AP4                | N.A.                                      |                           |                      |                                          |
|                             | AP5                | N.A.                                      |                           |                      |                                          |
| Service life                | AP1                | Calculated by EmissionRate <sup>(6)</sup> |                           |                      |                                          |
|                             | AP2                | Calculated by EmissionRate <sup>(6)</sup> |                           |                      |                                          |
|                             | AP3 <sup>(7)</sup> | $1.27 \times 10^{-4}$ ( $\alpha$ -HBCDD); |                           |                      |                                          |
|                             |                    | $1.44 \times 10^{-4}$ ( $\beta$ -HBCDD);  |                           |                      |                                          |
|                             |                    | $1.46 \times 10^{-4}$ ( $\gamma$ -HBCDD)  |                           |                      |                                          |
|                             | AP4                | Calculated by EmissionRate <sup>(6)</sup> |                           |                      |                                          |
|                             | AP5                | Calculated by EmissionRate <sup>(6)</sup> |                           |                      |                                          |
| Landfill                    |                    | $5.5 \times 10^{-6}$                      |                           |                      | $6.0 \times 10^{-5}$                     |
| WWTP                        |                    | Calculated by SimpleTreat                 |                           |                      |                                          |
| Dumping                     |                    | $5.5 \times 10^{-6}$                      | $1.1 \times 10^{-4}$      |                      | $1.7 \times 10^{-4}$                     |
| Incineration                |                    | $1.0 \times 10^{-6}$                      |                           |                      |                                          |
| Recycling                   |                    | $9.0 \times 10^{-6}$                      |                           |                      |                                          |
| Open burning <sup>(8)</sup> |                    | 0.612 ( $\alpha$ -HBCDD);                 |                           |                      | $8.0 \times 10^{-4}$ ( $\alpha$ -HBCDD); |
|                             |                    | 0.205 ( $\beta$ -HBCDD);                  |                           |                      | $1.7 \times 10^{-4}$ ( $\beta$ -HBCDD);  |
|                             |                    | 0.056 ( $\gamma$ -HBCDD)                  |                           |                      | $1.9 \times 10^{-4}$ ( $\gamma$ -HBCDD)  |

Taken from Li et al.<sup>16</sup> unless indicated otherwise. (N.A. = Not applicable)

Notes:

- (1) Taken from Li et al.<sup>16</sup>, assuming that 80% of wastewater goes to WWTP and the rest is discharged into freshwater, in accordance with the EU Technical Guidance Document on Risk Assessment.<sup>39</sup>
- (2) The average of atmospheric emission factors (ranging from 16 to 49 g t<sup>-1</sup>; calculated by dividing the “total potential emissions” by the “total volume sold” in corresponding years) from member companies participating in the Voluntary Emissions Control Action Programme.<sup>37</sup>
- (3) Since the EPS used in AP1 and AP4 are manufactured and processed in the same manner, we assume that emission factors in AP4 are identical to those in AP1.
- (4) Assumed to be the same as emission factors in AP1, in accordance with the EU risk assessment report.<sup>21</sup>
- (5) Here, “use” means (thermal) cutting of EPS and XPS insulation boards to fit the size of wall during installation.
- (6) The following parameters are used for calculation on the EmissionRate model: Application model – open application; products in AP1 and AP2 are used outdoors (i.e., temperature-dependent), whereas products in AP4 and AP5 are used indoors (i.e., temperature-independent); materials in AP1 and AP4 are pervious, whereas materials in AP2 and AP5 are impervious. Partition coefficients between product material and gaseous phase ( $K_{\text{product-gas}}$ ) are calculated using an empirical equation (suitable for “all materials”) in Guo.<sup>40</sup>
- (7) Calculated based on experimental data from Kajiwara et al.<sup>41</sup>
- (8) Calculated based on experimental data from Ni et al.<sup>42</sup>, in which waste polystyrene materials containing 5520 ( $\alpha$ ), 7120 ( $\beta$ ) and 8150 ( $\gamma$ ) ng HBCDD g<sup>-1</sup><sub>plastic</sub> were subject to open burning, releasing 3380 ( $\alpha$ ), 1462.37 ( $\beta$ ) and 458.67 ( $\gamma$ ) ng HBCDD g<sup>-1</sup><sub>plastic</sub> to air, and leaving 4.44 ( $\alpha$ ), 1.23 ( $\beta$ ) and 1.57 ( $\gamma$ ) ng HBCDD g<sup>-1</sup><sub>plastic</sub> as residual ash (assumed to enter the soil). Unlike other tested plastics, polystyrene can be completely burned out, generating a substantial amount of airborne particles but no residual ash. The bulk of HBCDD in polystyrene transfers to and resides in the airborne particles, whereby it enters the atmosphere. Note that isomerization during open burning has been considered in the measurement.

**Table S7** Fractions of polystyrene insulation boards (in AP1 and AP2) and packaging materials (in AP4) subject to recycling and reuse

|            | RE1                       | RE2                       | RE3                       | RE4                       | RE5                        | RE6                        | RE7                       |
|------------|---------------------------|---------------------------|---------------------------|---------------------------|----------------------------|----------------------------|---------------------------|
| 1965-1970  |                           |                           |                           |                           |                            |                            |                           |
| 1971-1980  |                           | 0% (APs1&2)<br>1.0% (AP4) |                           |                           |                            |                            |                           |
| 1981-1990  |                           | 0% (APs1&2)<br>2.0% (AP4) |                           |                           |                            |                            |                           |
| 1991-2000  | 0% (APs1&2)<br>1.0% (AP4) | 0% (APs1&2)<br>3.1% (AP4) | 0% (APs1&2)<br>0.5% (AP4) |                           | 9.8% (APs1&2)<br>45% (AP4) | 0% (APs1&2)<br>1.7% (AP4)  | 0% (APs1&2)<br>0.5% (AP4) |
| 2001-2010  | 0% (APs1&2)<br>1.0% (AP4) | 0% (APs1&2)<br>4.8% (AP4) | 0% (APs1&2)<br>0.9% (AP4) |                           | 7.6% (APs1&2)<br>55% (AP4) | 0.6% (APs1&2)<br>12% (AP4) | 0% (APs1&2)<br>0.2% (AP4) |
| 2010-2015  | 0% (APs1&2)<br>1.1% (AP4) | 0% (APs1&2)<br>4.8% (AP4) | 0% (APs1&2)<br>1.3% (AP4) | 0% (APs1&2)<br>1.6% (AP4) | 7.6% (APs1&2)<br>66% (AP4) | 0.6% (APs1&2)<br>28% (AP4) | 0% (APs1&2)<br>1.2% (AP4) |
| After 2016 | 9% (APs1&2)<br>1.1% (AP4) | 0% (APs1&2)<br>4.8% (AP4) | 0% (APs1&2)<br>1.7% (AP4) | 0% (APs1&2)<br>4.1% (AP4) | 7.6% (APs1&2)<br>77% (AP4) | 0.6% (APs1&2)<br>39% (AP4) | 0% (APs1&2)<br>1.7% (AP4) |

Source of historical data:

Data for RE1 are taken from Li et al.<sup>16</sup>

Record data of selected years for RE5 are taken from refs.<sup>21, 43, 44</sup> (for insulation boards) and refs.<sup>43, 45</sup> (for packaging materials).

Extrapolated to the years without record data.

Record data of selected years for RE6 are taken from ref.<sup>46</sup> (for insulation boards) and ref.<sup>47</sup> (for packaging materials). Extrapolated to the years without record data.

For the rest regions, due to a lack of representative record data, we assume that insulation boards are neither recycled nor reused, whereas the recycling fractions of packaging materials are recycled in the same proportion as general solid waste.

Data for the period after 2016 are assumed to be the same as data in 2015.

**Table S8** Isomerization factor matrixes

|                            | IF (resulting in $\gamma$ -dominant profile)                                                   | IF (resulting in $\alpha$ -dominant profile)                                                   |
|----------------------------|------------------------------------------------------------------------------------------------|------------------------------------------------------------------------------------------------|
| AP1 <sup>(1)</sup>         | $\begin{bmatrix} 1.00 & 0 & 0 \\ 0 & 1.00 & 0 \\ 0 & 0 & 1.00 \end{bmatrix}$                   | $\begin{bmatrix} 0.89 & 0 & 0.43 \\ 0.06 & 0.97 & 0.32 \\ 0.05 & 0.03 & 0.25 \end{bmatrix}$    |
| AP2 <sup>(2)</sup>         | $\begin{bmatrix} 0.88 & 0 & 0.39 \\ 0.06 & 0.97 & 0.36 \\ 0.06 & 0.03 & 0.25 \end{bmatrix}$    |                                                                                                |
| AP3 <sup>(3)</sup>         | $\begin{bmatrix} 0.90 & 0.18 & 0.18 \\ 0.04 & 0.78 & 0.10 \\ 0.06 & 0.04 & 0.72 \end{bmatrix}$ | $\begin{bmatrix} 0.90 & 0.14 & 0.42 \\ 0.04 & 0.82 & 0.13 \\ 0.06 & 0.04 & 0.45 \end{bmatrix}$ |
| AP4 <sup>(1)</sup>         | $\begin{bmatrix} 1.00 & 0 & 0 \\ 0 & 1.00 & 0 \\ 0 & 0 & 1.00 \end{bmatrix}$                   | $\begin{bmatrix} 0.89 & 0 & 0.43 \\ 0.06 & 0.97 & 0.32 \\ 0.05 & 0.03 & 0.25 \end{bmatrix}$    |
| AP5 <sup>(4)</sup>         | $\begin{bmatrix} 0.90 & 0.19 & 0.80 \\ 0.04 & 0.77 & 0.11 \\ 0.06 & 0.04 & 0.09 \end{bmatrix}$ |                                                                                                |
| Environment <sup>(5)</sup> | $\begin{bmatrix} 0.90 & 0.24 & 0.32 \\ 0.04 & 0.71 & 0.06 \\ 0.06 & 0.05 & 0.62 \end{bmatrix}$ |                                                                                                |

**Algorithm to calculate IF:**

According to eq.5 in the main text, we have

$$\begin{bmatrix} m_{\alpha,\text{after}} \\ m_{\beta,\text{after}} \\ m_{\gamma,\text{after}} \end{bmatrix} = \begin{bmatrix} \text{IF}_{\alpha \rightarrow \alpha} & \text{IF}_{\beta \rightarrow \alpha} & \text{IF}_{\gamma \rightarrow \alpha} \\ \text{IF}_{\alpha \rightarrow \beta} & \text{IF}_{\beta \rightarrow \beta} & \text{IF}_{\gamma \rightarrow \beta} \\ \text{IF}_{\alpha \rightarrow \gamma} & \text{IF}_{\beta \rightarrow \gamma} & \text{IF}_{\gamma \rightarrow \gamma} \end{bmatrix} \begin{bmatrix} m_{\alpha,\text{before}} \\ m_{\beta,\text{before}} \\ m_{\gamma,\text{before}} \end{bmatrix}$$

in which,  $\begin{bmatrix} m_{\alpha,\text{before}} & m_{\beta,\text{before}} & m_{\gamma,\text{before}} \end{bmatrix}^T$  describes diastereomer profile in products before thermal and light exposure, i.e., that measured in the technical HBCDD mixture,<sup>48</sup> and  $\begin{bmatrix} m_{\alpha,\text{after}} & m_{\beta,\text{after}} & m_{\gamma,\text{after}} \end{bmatrix}^T$

describes diastereomer profile after thermal and light exposure, i.e., that measured in end products in different applications (taken from literature-reported measurements).

Now define an error matrix:

$$\begin{bmatrix} \varepsilon_{\alpha,\text{after}} \\ \varepsilon_{\beta,\text{after}} \\ \varepsilon_{\gamma,\text{after}} \end{bmatrix} = \begin{bmatrix} m_{\alpha,\text{after}} \\ m_{\beta,\text{after}} \\ m_{\gamma,\text{after}} \end{bmatrix} - \begin{bmatrix} \text{IF}_{\alpha \rightarrow \alpha} & \text{IF}_{\beta \rightarrow \alpha} & \text{IF}_{\gamma \rightarrow \alpha} \\ \text{IF}_{\alpha \rightarrow \beta} & \text{IF}_{\beta \rightarrow \beta} & \text{IF}_{\gamma \rightarrow \beta} \\ \text{IF}_{\alpha \rightarrow \gamma} & \text{IF}_{\beta \rightarrow \gamma} & \text{IF}_{\gamma \rightarrow \gamma} \end{bmatrix} \begin{bmatrix} m_{\alpha,\text{before}} \\ m_{\beta,\text{before}} \\ m_{\gamma,\text{before}} \end{bmatrix}.$$

The best estimate of **IF** should minimize:  $\varepsilon_{\alpha,\text{after}}^2 + \varepsilon_{\beta,\text{after}}^2 + \varepsilon_{\gamma,\text{after}}^2$ ,

$$\text{subject to: } \begin{cases} \text{IF}_{\alpha \rightarrow \alpha} + \text{IF}_{\alpha \rightarrow \beta} + \text{IF}_{\alpha \rightarrow \gamma} = 1 \\ \text{IF}_{\beta \rightarrow \alpha} + \text{IF}_{\beta \rightarrow \beta} + \text{IF}_{\beta \rightarrow \gamma} = 1. \\ \text{IF}_{\gamma \rightarrow \alpha} + \text{IF}_{\gamma \rightarrow \beta} + \text{IF}_{\gamma \rightarrow \gamma} = 1 \end{cases}$$

Optimization of the above equations requires an initial value of **IF** (i.e., an *a priori* estimate). In this work, we choose the isomerization factor matrix describing photo-isomerization in the environment as the initial value because it can be directly calculated from experimental data in Harrad et al.<sup>49</sup> The Generalized Reduced Gradient (GRG) nonlinear solving method is used for optimization.

Notes:

- (1) EPS is usually manufactured at low temperatures (80–120 °C). The diastereomer composition can remain the same as that in the technical HBCDD mixture (i.e.,  $\gamma$ -dominant) or be altered slightly to a profile consisting of 46%( $\alpha$ ) : 33%( $\beta$ ) : 21%( $\gamma$ )<sup>50</sup> (i.e.,  $\alpha$ -dominant);
- (2) XPS is usually manufactured at high temperatures (>120 °C). The diastereomer profile is already stable and thus unaltered when subject to further thermal processing;<sup>50</sup>
- (3) HBCDD diastereomer profiles are rather diverse in different textile samples. Here we adopt two diastereomer profiles with the most abundant  $\gamma$ -HBCDD and  $\alpha$ -HBCDD, respectively, from measurements in Kajiwara et al.<sup>51</sup>;
- (4) Given that HIPS is usually manufactured at very high temperatures (>180 °C), the diastereomer profile is assumed to be the same as that in equilibrium<sup>52, 53</sup> due to lack of measured data;
- (5) Calculated based on experimental data in Harrad et al.<sup>49</sup>

**Figure S1** Lifespan distribution of buildings in seven modeled regions

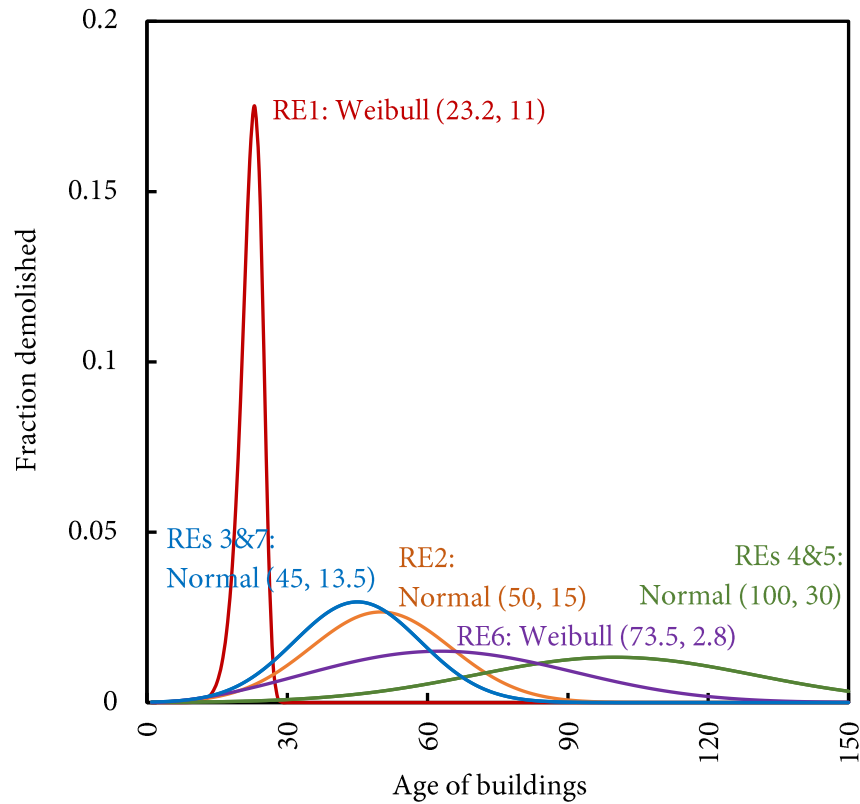

Note:

RE1: Lifespan distribution is taken from Cai et al.<sup>54</sup>

RE2: Based on Japanese data. Murakami et al.<sup>55</sup> compiled building lifespans in different parts of Japan, ranging from 38 (25th percentile) to 63 years (75th percentile). We assume that the average building lifespan in Japan is 50 years, and the standard deviation is 30% of the average.

RE3: Earlier studies assigned a lifespan of 40 years to Indonesian buildings,<sup>56</sup> and a lifespan of 50 years to Thai buildings.<sup>57</sup> We assume that the average lifespan is 45 years in RE3, and the standard deviation is 30% of the average.

RE4: Lifespan distribution is assumed to be the same as that in RE5.

RE5: Earlier surveyed data demonstrate building lifespans of 68 – 80 years for Zurich, Switzerland (for the period 1970-2010)<sup>58</sup>, 54 – 95 years for Spain<sup>59</sup>, >180 years for Switzerland.<sup>60</sup> Earlier simulations assumed building lifespans of 100 years for the Netherlands,<sup>61</sup> and 60 (large and other buildings) – 90 (small buildings) years for Norway.<sup>62</sup> We assumed the average lifespan is 100 years for this region, and the standard deviation is 30% of the average.

RE6: Lifespan distribution is taken from Aktas et al.<sup>63</sup>

RE7: Lifespan distribution is assumed to be the same as that in RE3.

**Figure S2** Response of modeled atmospheric concentrations in grid cells #79 (a), #81 (b) and #13 (c) to emissions

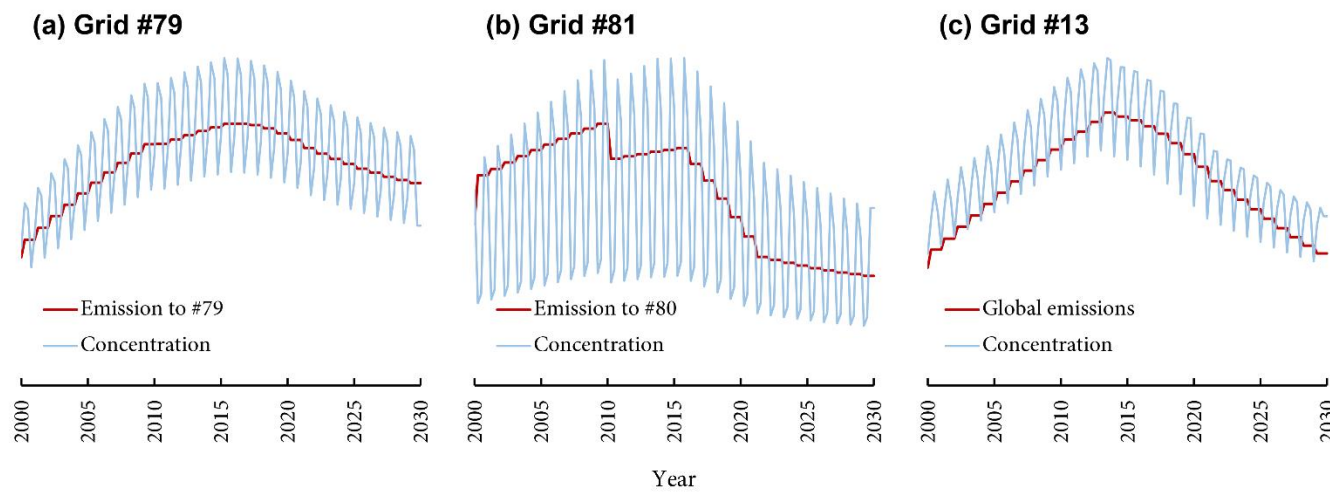

## References

1. Li, H.; Mo, L.; Yu, Z.; Sheng, G.; Fu, J., Levels, isomer profiles and chiral signatures of particle-bound hexabromocyclododecanes in ambient air around Shanghai, China. *Environ. Pollut.* **2012**, *165*, 140-146.
2. Gao, S.; Wang, J.; Yu, Z.; Guo, Q.; Sheng, G.; Fu, J., Hexabromocyclododecanes in surface soils from e-waste recycling areas and industrial areas in South China: concentrations, diastereoisomer-and enantiomer-specific profiles, and inventory. *Environ. Sci. Technol.* **2011**, *45*, (6), 2093-2099.
3. Li, H.; Zhang, Q.; Wang, P.; Li, Y.; Lv, J.; Chen, W.; Geng, D.; Wang, Y.; Wang, T.; Jiang, G., Levels and distribution of hexabromocyclododecane (HBCD) in environmental samples near manufacturing facilities in Laizhou Bay area, East China. *J. Environ. Monit.* **2012**, *14*, (10), 2591-2597.
4. Zhang, Y.; Li, Q.; Lu, Y.; Jones, K.; Sweetman, A. J., Hexabromocyclododecanes (HBCDDs) in surface soils from coastal cities in North China: Correlation between diastereoisomer profiles and industrial activities. *Chemosphere* **2016**, *148*, 504-510.
5. Manø, S.; Herzke, D.; Schlabach, M. *New Organic Pollutants in Air, 2007 (Norwegian Pollution Monitoring Programme, TA 2689/2010)*; Climate and Control Agency of Norway: Oslo, 2008.
6. Vorkamp, K.; Bossi, R.; Rigét, F. F.; Skov, H.; Sonne, C.; Dietz, R., Novel brominated flame retardants and dechlorane plus in Greenland air and biota. *Environ. Pollut.* **2015**, *196*, 284-291.
7. Olukunle, O. I.; Venier, M.; Hites, R. A.; Salamova, A., Atmospheric concentrations of hexabromocyclododecane (HBCDD) diastereomers in the Great Lakes region. *Chemosphere* **2018**, *200*, 464-470.
8. Hoh, E.; Hites, R. A., Brominated flame retardants in the atmosphere of the east-central United States. *Environ. Sci. Technol.* **2005**, *39*, (20), 7794-7802.
9. Yu, Z.; Chen, L.; Mai, B.; Wu, M.; Sheng, G.; Fu, J.; Peng, P., Diastereoisomer-and enantiomer-specific profiles of hexabromocyclododecane in the atmosphere of an urban city in South China. *Environ. Sci. Technol.* **2008**, *42*, (11), 3996-4001.
10. Drage, D. S.; Newton, S.; de Wit, C. A.; Harrad, S., Concentrations of legacy and emerging flame retardants in air and soil on a transect in the UK West Midlands. *Chemosphere* **2016**, *148*, 195-203.
11. Newton, S.; Sellström, U.; de Wit, C. A., Emerging flame retardants, PBDEs, and HBCDDs in indoor and outdoor media in Stockholm, Sweden. *Environ. Sci. Technol.* **2015**, *49*, (5), 2912-2920.
12. Arnot, J. A.; McCarty, L.; Armitage, J. M.; Toose-Reid, L.; Wania, F.; Cousins, I. T. *An Evaluation of Hexabromocyclododecane (HBCD) for Persistent Organic Pollutant (POP) Properties and the*



*Potential for Adverse Effects in the Environment*; European Brominated Flame Retardant Industry Panel (EBFRIP): 2009.

13. Li, L.; Wania, F., Tracking chemicals in products around the world: introduction of a dynamic substance flow analysis model and application to PCBs. *Environ. Int.* **2016**, *94*, 674-686.
14. MacLeod, M.; Scheringer, M.; Hungerbühler, K., Estimating enthalpy of vaporization from vapor pressure using Trouton's Rule. *Environ. Sci. Technol.* **2007**, *41*, (8), 2827-2832.
15. Davis, J. W.; Gonsior, S. J.; Markham, D. A.; Friederich, U.; Hunziker, R. W.; Ariano, J. M., Biodegradation and product identification of <sup>14</sup>C hexabromocyclododecane in wastewater sludge and freshwater aquatic sediment. *Environ. Sci. Technol.* **2006**, *40*, (17), 5395-5401.
16. Li, L.; Weber, R.; Liu, J.; Hu, J., Long-term emissions of hexabromocyclododecane as a chemical of concern in products in China. *Environ. Int.* **2016**, *91*, 291-300.
17. Yi, S.; Liu, J.; Jin, J.; Zhu, J., Assessment of the occupational and environmental risks of hexabromocyclododecane (HBCD) in China. *Chemosphere* **2016**, *150*, 431-437.
18. Anonymous. *Risk Assessment for Chemicals in Articles: HBCDD* (製品含有化学物質のリスク評価: ヘキサブロモシクロドデカン); Ministry of Health, Labour and Welfare of Japan (日本厚生労働省): Tokyo, 2013; p 76 (In Japanese).
19. Managaki, S.; Miyake, Y.; Yokoyama, Y.; Hondo, H.; Masunaga, S.; Nakai, S.; Kobayashi, T.; Kameya, T.; Kimura, A.; Nakarai, T.; Oka, Y.; Otani, H.; Miyake, A., Emission load of hexabromocyclododecane in Japan based on the substance flow analysis. *Organohalogen Compd.* **2009**, *71*, 2471-2476.
20. Watanabe, I.; Sakai, S.-i., Environmental release and behavior of brominated flame retardants. *Environ. Int.* **2003**, *29*, (6), 665-682.
21. EU *Risk Assessment on Hexabromocyclododecane (Final report)*; European Union (EU): Luxembourg, 2008.
22. Managaki, S.; Enomoto, I.; Masunaga, S., Sources and distribution of hexabromocyclododecanes (HBCDs) in Japanese river sediment. *J. Environ. Monit.* **2012**, *14*, (3), 901-907.
23. Säll, L. *Exploration of Management Options for Hexabromocyclododecane (HBCD)*. Paper for the 8th meeting of the UNECE CLRTAP Task Force on Persistent Organic Pollutants; Climate and Pollution Agency in Norway: Montreal, 2010.
24. Stockholm Convention Register of Specific Exemptions: Hexabromocyclododecane. <http://chm.pops.int/Implementation/Exemptionsandacceptablepurposes/RegisterofSpecificExemptions/HexabromocyclododecaneRoSE/tabid/5034/Default.aspx> (accessed: January 1<sup>st</sup>, 2018)
25. Arctic Monitoring and Assessment Programme (AMAP) *Final Report of Phase I of the ACAP Project on Brominated Flame Retardants (BFRs). Phase I: Inventory of sources and identification*

*of BFR alternatives and management strategies*; Arctic Monitoring and Assessment Programme: Oslo, 2007.

26. Environment Canada; Health Canada *Screening Assessment Report on Hexabromocyclododecane (Chemical Abstracts Service Registry Number 3194-55-6)*; Environment Canada: Wellington, 2011.
27. ECHA *Estimating the Abatement Costs of Hazardous Chemicals: A Review of the Results of Six Case Studies*; European Chemicals Agency (ECHA): Helsinki, Finland, 2013.
28. Morose, G. *An Overview of Alternatives to Tetrabromobisphenol A (TBBPA) and Hexabromocyclododecane (HBCD)* Lowell Center for Sustainable Production (LCSP), University of Massachusetts: Lowell, 2006.
29. USEPA *Use and Market Profile for Hexabromocyclododecane (HBCD). Documents supporting USEPA TSCA review and risk evaluation of HBCD (Hexabromocyclododecane) or cyclic aliphatic bromide cluster (EPA-HQ-OPPT-2016-0735-0049)*; U.S. Environmental Protection Agency: Washington, D.C., 2017.
30. *ESWI Study on Waste Related Issues of Newly Listed POPs and Candidate POPs (Final Report)*; Consortium Expert team to Support Waste Implementation (ESWI): Munich, 2011.
31. ECHA *Background Document for Hexabromocyclododecane and All Major Diastereoisomers Identified*; European Chemicals Agency (ECHA): Helsinki, Finland, 2009.
32. USEPA *Flame Retardant Alternatives for Hexabromocyclododecane (HBCD) (Final report, EPA Publication 740R14001)*; U.S. Environmental Protection Agency: Washington D.C., 2014.
33. AMEC Environment & Infrastructure UK Limited *Feasibility Study on Substituting HBCD with Polymeric Flame Retardant. Final Report*; AMEC Environment & Infrastructure UK Limited: London, 2014.
34. ICL *Submission of Information on Alternatives for Applications for Authorisation HBCD Use in EPS for Building Applications*; ICL-IP Europe BV: Amsterdam, 2014.
35. ECHA *Data on Manufacture, Import, Export, Uses and Releases of HBCDD as well as Information on Potential Alternatives to its Use*; European Chemicals Agency (ECHA): Helsinki, Finland, 2009; Available at [http://echa.europa.eu/documents/10162/13640/tech\\_rep\\_hbcd\\_en.pdf](http://echa.europa.eu/documents/10162/13640/tech_rep_hbcd_en.pdf). (accessed: November 19<sup>th</sup>, 2014).
36. VECAP *Striving for Excellence: The Voluntary Emissions Control Action Program: Third Annual Progress Report 2010*; Voluntary Emissions Control Action Program (VECAP) in Europe: Brussels, Belgium, 2010.
37. VECAP *The Voluntary Emissions Control Action Program: European Annual Progress Report 2013*; Voluntary Emissions Control Action Program (VECAP) in Europe: Brussels, Belgium, 2013.

38. POPRC *Risk Profile on Hexabromocyclododecane*(UNEP/POPS/POPRC.6/13/Add.2); Persistent Organic Pollutants Review Committee: Geneva, 2010.
39. European Chemicals Bureau *Technical Guidance Document on Risk Assessment*; Italy, 2006.
40. Guo, Z., Review of indoor emission source models. Part 2. Parameter estimation. *Environ. Pollut.* **2002**, *120*, (3), 551-564.
41. Kajiwara, N.; Takigami, H., Emission behavior of hexabromocyclododecanes and polybrominated diphenyl ethers from flame-retardant-treated textiles. *Environ. Sci. Process. Impact.* **2013**, *15*, (10), 1957-1963.
42. Ni, H.; Lu, S.; Mo, T.; Zeng, H., Brominated flame retardant emissions from the open burning of five plastic wastes and implications for environmental exposure in China. *Environ. Pollut.* **2016**, *214*, 70-76.
43. Mader, F. W. In *Plastics waste management in Europe*, Makromolekulare Chemie. Macromolecular Symposia, 1992; Wiley Online Library: 1992; pp 15-31.
44. PlasticEurope *Plastics - the Facts 2012. An Analysis of European Plastics Production, Demand and Waste Data for 2011*; PlasticsEurope: Brussels, 2012.
45. EUROSTAT Packaging Waste Statistics.  
[http://ec.europa.eu/eurostat/statistics-explained/index.php/Packaging\\_waste\\_statistics](http://ec.europa.eu/eurostat/statistics-explained/index.php/Packaging_waste_statistics) (accessed: November 15<sup>th</sup>, 2015),
46. Integrated Waste Management Board (IWMB) *Use and Disposal of Polystyrene in California: A Report to the California Legislature* Integrated Waste Management Board: Sacramento, CA, 2004.
47. EPS Industry Alliance *EPS Recycling Rate Report*; EPS Industry Alliance: Crofton, MD, 2013.
48. Heeb, N. V.; Schweizer, W. B.; Kohler, M.; Gerecke, A. C., Structure elucidation of hexabromocyclododecanes—a class of compounds with a complex stereochemistry. *Chemosphere* **2005**, *61*, (1), 65-73.
49. Harrad, S.; Abdallah, M. A.-E.; Covaci, A., Causes of variability in concentrations and diastereomer patterns of hexabromocyclododecanes in indoor dust. *Environ. Int.* **2009**, *35*, (3), 573-579.
50. Heeb, N. V.; Graf, H.; Bernd Schweizer, W.; Lienemann, P., Thermally-induced transformation of hexabromocyclo dodecanes and isobutoxypenta bromocyclododecanes in flame-proofed polystyrene materials. *Chemosphere* **2010**, *80*, (7), 701-708.
51. Kajiwara, N.; Sueoka, M.; Ohiwa, T.; Takigami, H., Determination of flame-retardant hexabromocyclododecane diastereomers in textiles. *Chemosphere* **2009**, *74*, (11), 1485-1489.
52. Peled, M.; Scharia, R.; Sondack, D., Thermal rearrangement of hexabromocyclododecane (HBCD). In *Industrial Chemistry Library, Advances in Organobromine Chemistry*, Desmurs, J.-R.; Gérard, B.; Goldstein, M. J., Eds. Elsevier: Amsterdam, The Netherlands, 1995; pp 92-99.

53. Köppen, R.; Becker, R.; Jung, C.; Nehls, I., On the thermally induced isomerisation of hexabromocyclododecane stereoisomers. *Chemosphere* **2008**, *71*, (4), 656-662.
54. Cai, W.; Wan, L.; Jiang, Y.; Wang, C.; Lin, L., The short-lived buildings in China: Impacts on water, energy and carbon emissions. *Environ. Sci. Technol.* **2015**, *49*, 13921-13928.
55. Murakami, S.; Oguchi, M.; Tasaki, T.; Daigo, I.; Hashimoto, S., Lifespan of commodities, part I: The creation of a database and its review. *J. Ind. Ecol.* **2010**, *14*, (4), 598-612.
56. Utama, A.; Gheewala, S. H., Indonesian residential high rise buildings: A life cycle energy assessment. *Energ. Buildings* **2009**, *41*, (11), 1263-1268.
57. Kofoworola, O. F.; Gheewala, S. H., Life cycle energy assessment of a typical office building in Thailand. *Energ. Buildings* **2009**, *41*, (10), 1076-1083.
58. Aksözen, M.; Hassler, U.; Kohler, N., Reconstitution of the dynamics of an urban building stock. *Build. Res. Info.* **2016**, *45*, (3), 239-258.
59. Rincón, L.; Pérez, G.; Cabeza, L. F., Service life of the dwelling stock in Spain. *Int. J. LCA* **2013**, *18*, (5), 919-925.
60. Kornmann, M.; Queisser, A., Service life of the building stock of Switzerland. *Mauerwerk* **2012**, *16*, (4), 210-215.
61. Verbiest, P.; van den Ven, P. *Measurement of capital stock and consumption of fixed capital in the Netherlands. STD/NA(97)12*; Statistics Netherlands: 1997.
62. Bergsdal, H.; Bohne, R. A.; Brattebø, H., Projection of construction and demolition waste in Norway. *J. Ind. Ecol.* **2007**, *11*, (3), 27-39.
63. Aktas, C. B.; Bilec, M. M., Impact of lifetime on US residential building LCA results. *Int. J. LCA* **2012**, *17*, (3), 337-349.
